# Supplementary material for: Neurosecretory Protein GL Accelerates Liver Steatosis in Mice Fed Medium-Fat/Medium-Fructose Diet
Source: MDPI journal article supplement (doi:10.3390/ijms23042071), 2022-02-13
Supplement: s1 [file s1]

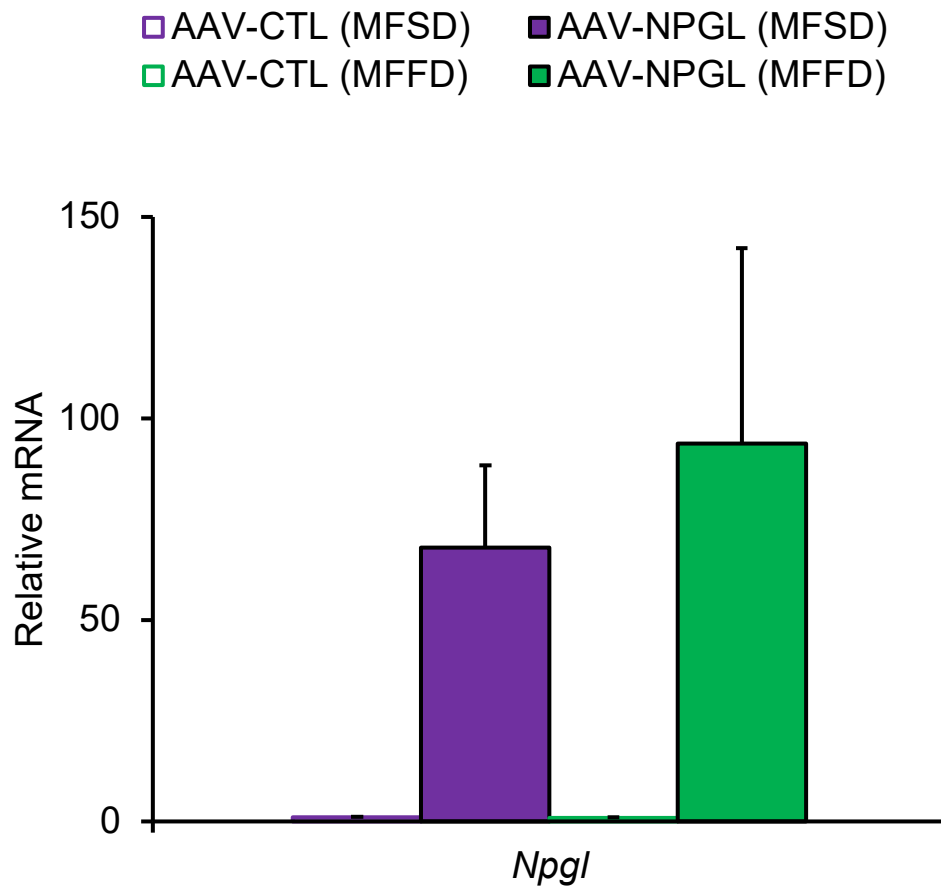

**Figure S1.** mRNA expression level of *Npgl* in the mediobasal hypothalamus at the endpoint of *Npgl* overexpression. Each value represents the mean  $\pm$  standard error of the mean (n = 5–6). Differences between groups were assessed by two-way ANOVA (Treatment:  $p < 0.01$ , Diet:  $p = 0.627$ , Interaction:  $p = 0.625$ ). NPGL, neurosecretory protein GL; AAV-CTL, AAV-based control vector; AAV-NPGL, AAV-based NPGL-precursor gene vector; MFSD, medium-fat/medium-sucrose diet; MFFD, medium-fat/medium-fructose diet.
